# Supplementary material for: Melanic variation underlies aposematic color variation in two hymenopteran mimicry systems
Source: PubMed Central journal article supplement (PMC5533327; doi:10.1371/journal.pone.0182135), 2017-07-28
Supplement: pone.0182135.s001.pdf [file pone.0182135.s001.pdf]

**A**

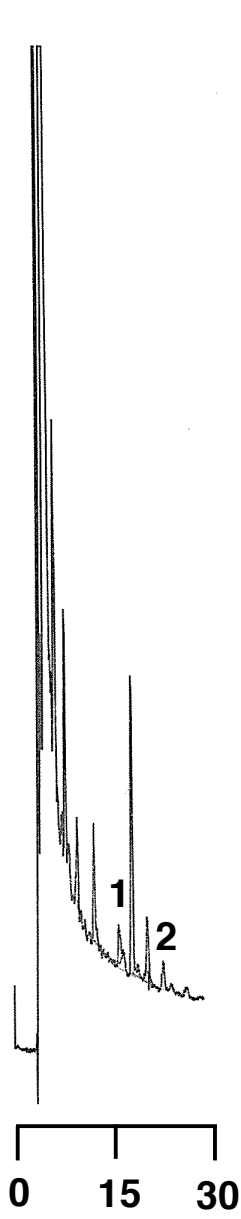

**B**

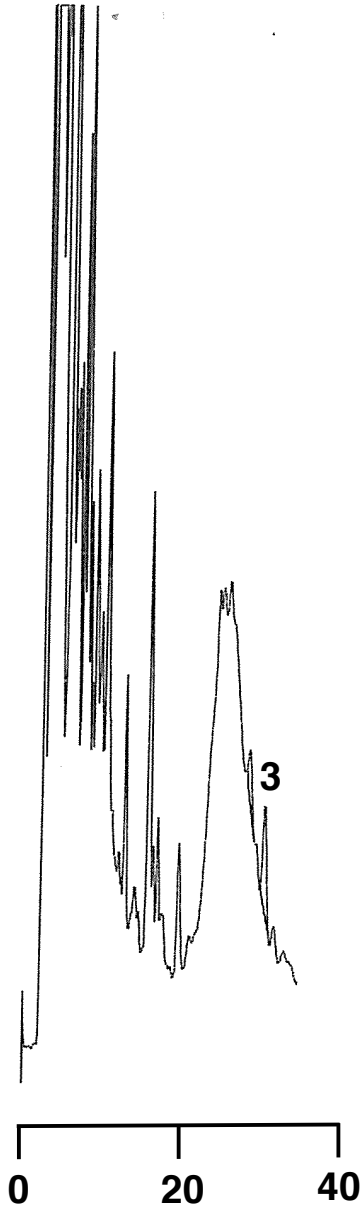

**C**

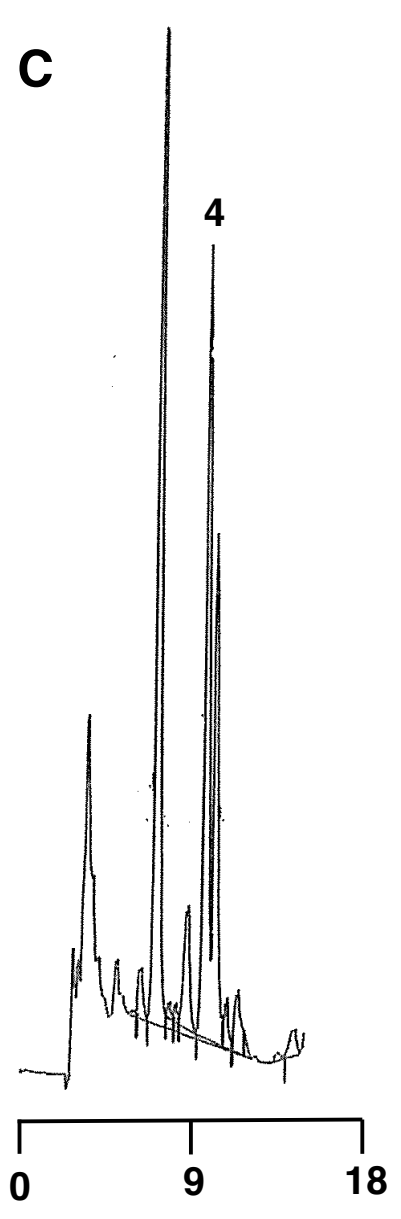

**Retention time (min.)**
